# Supplementary material for: Reduction in Earth Reflected Radiance during the Eclipse of 21 August 2017
Source: Copernicus journal article supplement (doi:10.5194/amt-2017-475), 2018-02-12
Supplement: Supplementary file [file amt-2017-475-AC2-supplement.pdf]

# Interactive comment on “Reduction in Earth Reflected Radiance during the Eclipse of 21 August 2017” by Jay Herman et al.

August 2017” by Jay Herman et al.

Anonymous Referee #1

Received and published: 23 April 2018

The paper has considerably improved. Most of the my comments and recommendations have been already mentioned by reviewer #1. From my point of view the Maignan et al., 2004 study has to be reported in the introduction sections and the "differences" observed with this study have to be reported in more detail in the section that currently this work is mentioned.

I think this is an interesting and unique work that should be published in AMT.

I have added a new figure and text describing the comparison between POLDER and EPIC related to the Maignan et al. 2004 paper. I have also added a mention of the Maignan et al. paper in the introduction.

Measured backscattered radiances of the entire sunlit Earth were obtained during the 21 August 2017 eclipse from EPIC (Earth Polychromatic Imaging Camera) on the DSCOVR (Deep Space Climate Observatory) satellite. EPIC obtains synoptic observations of the Earth from an orbit around the  $L_1$  point (Lagrange 1) 1.5 million km from Earth (Herman et al., 2018). EPIC top of the atmosphere TOA albedo measurements, made at a backscatter angle of  $172^\circ$ , are in the enhanced reflectivity regime (hotspot angles). EPIC non-eclipse day TOA albedos are compared to POLDER surface reflectivity measurements at  $8^\circ$  (Maignan et al., 2004). This study focuses on data from two selected locations during the 21 August

354 The TOA eclipse measurements made by EPIC are near the hotspot backscatter direction ( $172^\circ$ )  
 355 for the incident solar irradiance over nearly cloud-free scenes. For land surfaces, such as the  
 356 observations made at Casper and Columbia, measurements from the POLDER satellite over Khingan  
 357 Range, China ( $117.55^\circ\text{E}$  to  $131.56^\circ\text{E}$ ,  $45.68^\circ\text{N}$  to  $53.56^\circ\text{N}$ ) show that the backscatter amount from the  
 358 land surface increases with increasing wavelength (Maignan et al., 2004). For EPIC albedo data over  
 359 grassland that are comparable to the POLDER measurements, the C/s data in Fig. 9 can be converted to  
 360 TOA albedo. When this is done (Fig. 10), the wavelength dependence of the EPIC TOA albedo (551, 680,  
 361 and 780 nm) is similar to POLDER surface reflectance at  $8^\circ$  even though there is no EPIC atmospheric  
 362 correction and there is some light cloud cover. The average TOA albedo from EPIC was almost the same  
 363 on 20 Aug. as on 23 Aug. (Fig.10A).  
 364

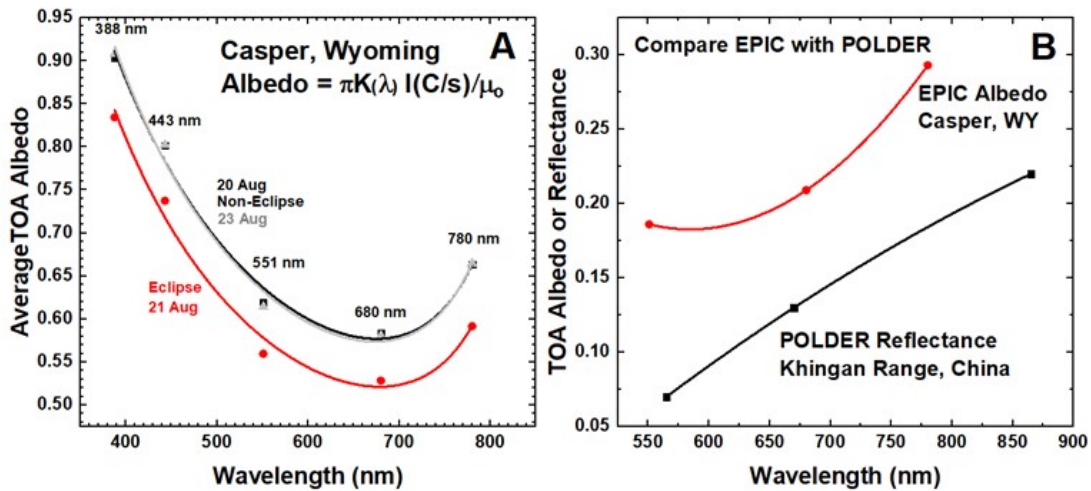

Fig. 10 A. The measured albedo at Casper Wyoming on 20 Aug (black curve) and 23 Aug (grey curve) compared to B the POLDER measured surface reflectance in the Khingan Range, China ( Maignan et al., 2004) corresponding to  $8^\circ$  from overhead sun.

365

366 The shape and magnitude differences are partially caused by the atmospheric component of the  
 367 albedo that includes some light cloud cover, whereas the POLDER reflectance has atmospheric effects  
 368 subtracted. The effect of increasing Rayleigh scattering is seen for shorter wavelengths measured by  
 369 EPIC. The Khingan range is mainly covered by deciduous broadleaf and a mix of deciduous and  
 370 evergreen needle leaf forest with a small amount of grassland, while the area around Casper is mainly  
 371 short grass prairie land with few trees.
